# Supplementary material for: Development of Al-doped ZnO thin film as a transparent cathode and anode for application in transparent organic light-emitting diodes
Source: Royal Society of Chemistry journal article supplement (doi:10.1039/c6ra14124b), 2016-01-01
Supplement: c6ra14124b1.pdf [file c6ra14124b1.pdf]

### Supplementary Information (S1)

Notice that the energy band gap is higher than the  $E_{go} \sim 3.30$  eV of bulk ZnO in all the cases.<sup>52</sup> This amounts to widening of band gap with respect to bulk ZnO by 0.11, 0.21, 0.27, 0.29, and 0.32 eV. In contrast, Burstein-Moss shift of band gap deduced from<sup>53</sup>

$$\Delta E_{BM} = (\hbar^2/8 m_e^*) [3n/\pi]^{2/3} \quad (1)$$

taking  $m_e^* = 0.3m_0$  with electron mass  $m_0 \sim 9.109 \times 10^{-31}$  kg at different carrier concentrations ( $n$ ) turns out to be higher and in the range of 0.17–0.85 eV.

Obviously, the observed variation in energy band gap is less and can be explained by invoking band gap renormalization/ narrowing as well.<sup>54</sup> The band gap narrowing

( $\Delta E_{BGN}$ ) is given by<sup>54</sup>

$$\Delta E_{BGN} = An^{1/3} [1 - (n_c/n)^{1/3}] \quad (2)$$

where  $A$  is constant. The observed band gap ( $E_g$ ) can be defined as

$$E_g = E_{go} + \Delta E_{BM} - \Delta E_{BGN} \quad (3)$$

Taking  $E_g$ ,  $\Delta E_{BM}$  as obtained from eq. (1), and  $E_{go} = 3.30$  eV for bulk ZnO,  $\Delta E_{BGN}$  has been deduced from eq. (3) for each case (Table 3). The linear fit of  $\Delta E_{BGN}$  versus  $n^{1/3}$  plot at higher carrier concentration gives slope 'A' and its intercept on abscissa (by extrapolation) corresponds to  $n_c^{1/3}$  (Fig. S1(a)). Incidentally,  $\Delta E_{BGN}$  versus  $n$  plots following eq. (2) with  $n_c = 5.40 \times 10^{19}$  cm<sup>-3</sup> and  $A = 1.055 \times 10^{-7}$  eV–cm in semi-log and log-log scales shown in Fig. S1(b) are consistent with the experimental data.

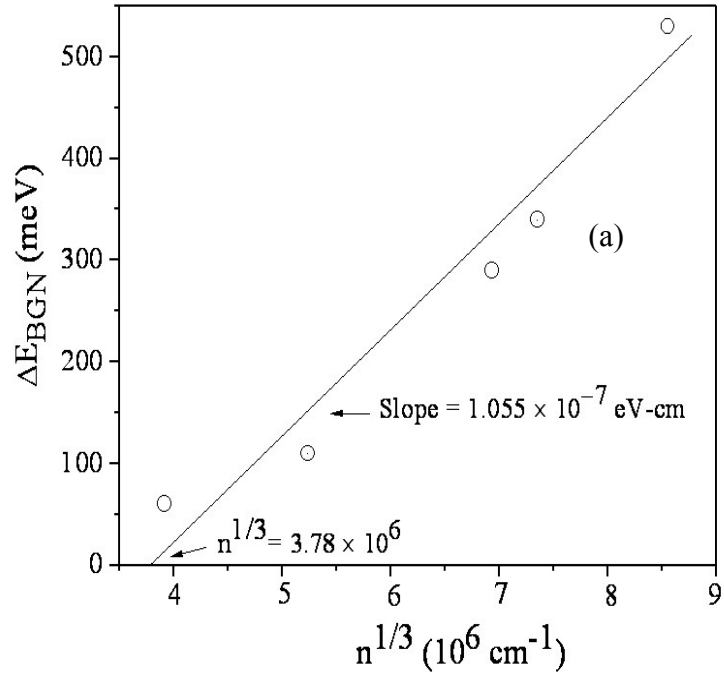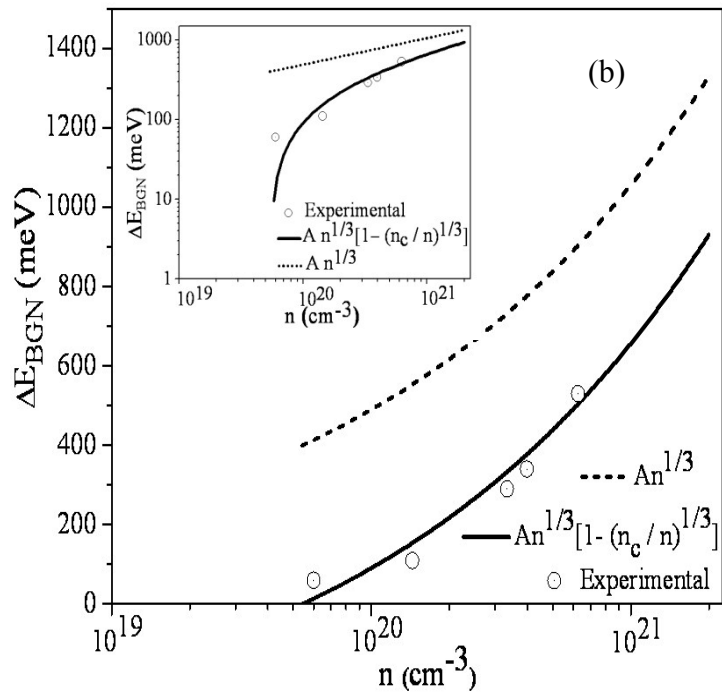

**Figure S1.** (a)  $\Delta E_{\text{BGN}}$  versus  $n^{1/3}$  plot of R.F. sputtered AZO films, (b) Nature of  $\Delta E_{\text{BGN}}$  versus  $n$  plots following  $\Delta E_{\text{BGN}} = A n^{1/3}$  and  $A n^{1/3} \{1 - (n_c/n)^{1/3}\}$  with inset depicting the corresponding curves in log-log scale; the experimental data are shown by symbols.

The figure of merit,<sup>55</sup> expressed as  $F_{TC} = -1/(\rho \ln T)$ , where  $\rho$  is resistivity,  $T$  is average transmittance of film in visible region, improves in the AZO films with increase in R. F. power density and lies in the range  $1.7 \times 10^3 - 9.5 \times 10^3 \Omega^{-1} \text{ cm}^{-1}$  (Table 3).
